# Supplementary material for: Depleted depletion drives polymer swelling in poor solvent mixtures
Source: PubMed Central journal article supplement (PMC5680348; doi:10.1038/s41467-017-01520-5), 2017-11-09
Supplement: 41467_2017_1520_MOESM1_ESM.pdf [file 41467_2017_1520_MOESM1_ESM.pdf]

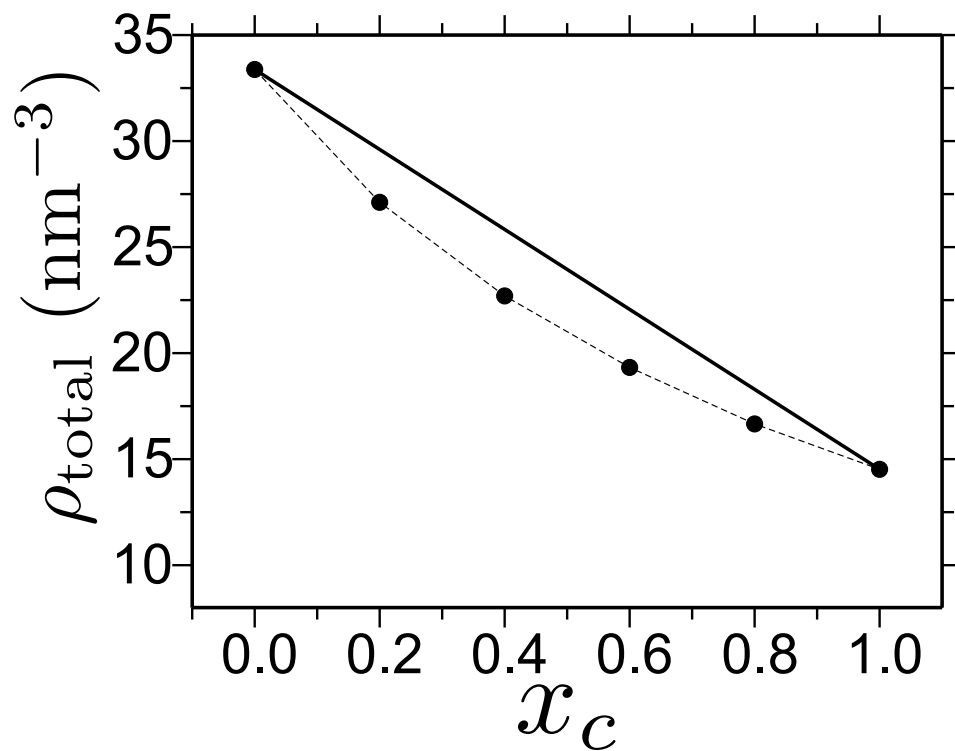

**Supplementary Figure 1:** Total number density  $\rho_{\text{total}}$  of the bulk solution as a function of cosolvent mole fraction  $x_c$  for aqueous methanol solution for ambient pressure and 298 K temperature. The data is extracted from the all-atom simulations. Solid lines are linear interpolation between the data points of  $x_c = 0.0$  and  $x_c = 1.0$ .

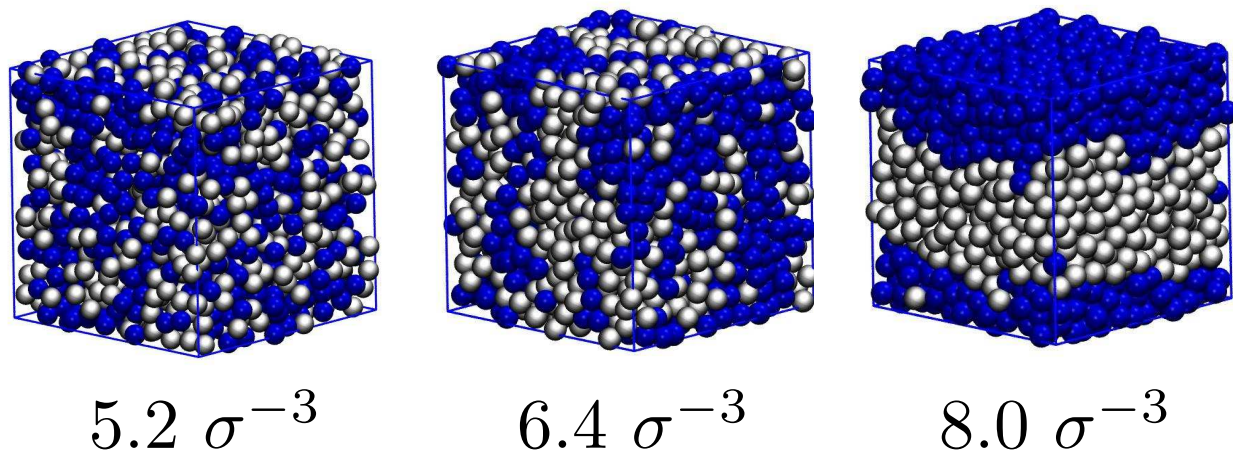

**Supplementary Figure 2:** Simulation snapshots of the generic system presenting bulk solution arrangements for three different densities. The results are shown for  $x_c = 0.5$ .

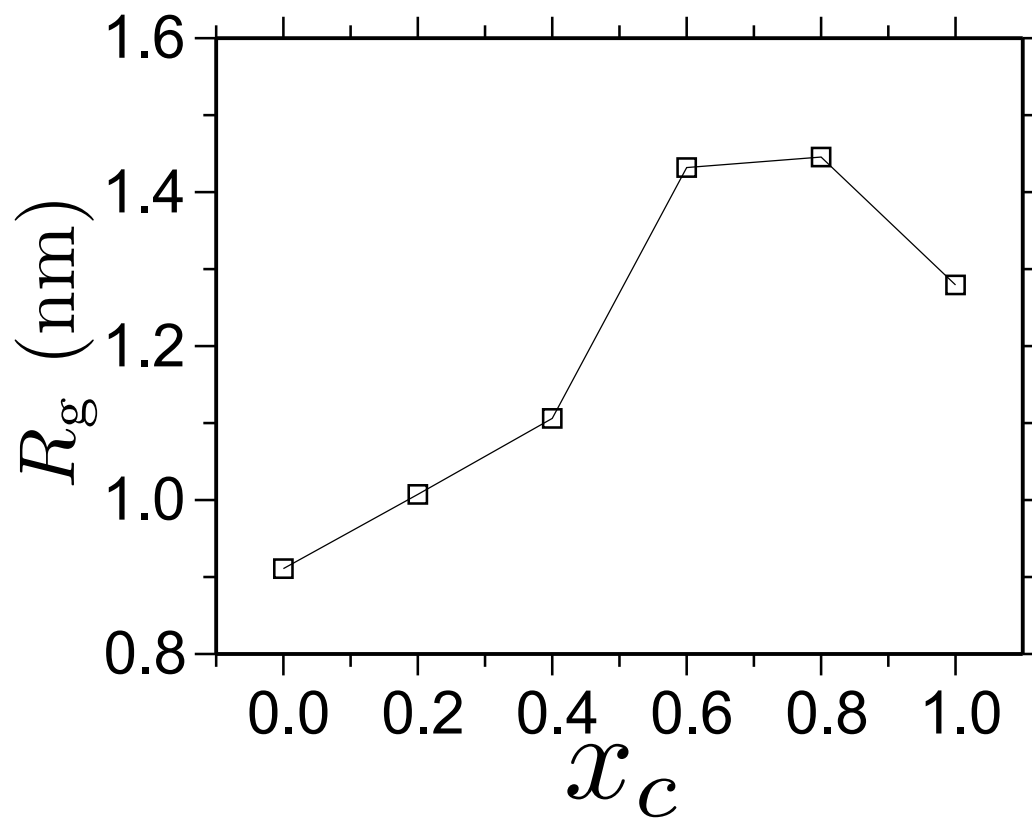

**Supplementary Figure 3:** Gyration radius  $R_g$  of a PMMA chain as a function of methanol mole fraction  $x_c$ .

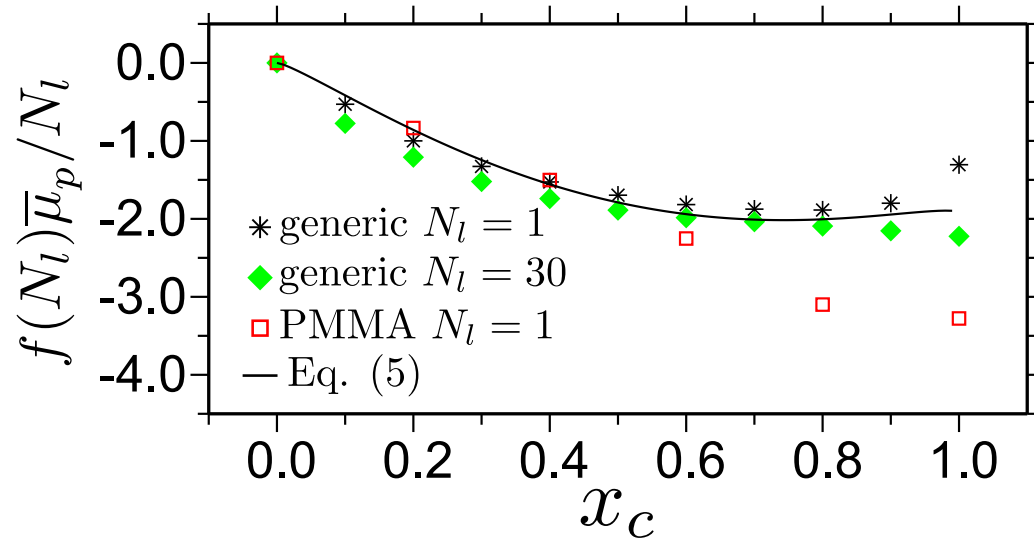

**Supplementary Figure 4:** Chemical potential shift  $\bar{\mu}_p = \mu_p/k_B T$  per monomer as a function of cosolvent mole fraction  $x_c$ . The master curve is obtained by normalizing  $\bar{\mu}_p$  with a chain length  $N_l$  dependent function  $f(N_l) = 2N_l/(N_l + 1)$ . The line is a fit to the data by Supplementary Eq. 2.

**Supplementary Table 1:** Lennard-Jones (LJ) interactions for the generic model.  $p$ ,  $s$  and  $c$  represents polymer, solvent and cosolvent, respectively.

| LJ energy       | Symmetric     | Case 1        | Case 2        | Cut-off                     |
|-----------------|---------------|---------------|---------------|-----------------------------|
| $\epsilon_{pp}$ | $1.0\epsilon$ | $1.0\epsilon$ | $1.0\epsilon$ | $2^{1/6}\sigma$             |
| $\epsilon_{ps}$ | $3.5\epsilon$ | $3.5\epsilon$ | $3.5\epsilon$ | $0.75 \times 2^{1/6}\sigma$ |
| $\epsilon_{pc}$ | $3.5\epsilon$ | $2.5\epsilon$ | $2.0\epsilon$ | $0.75 \times 2^{1/6}\sigma$ |

## Supplementary Note 1: Computational details

In this work a modified OPLS force field of methyl acetate [1] was used to simulate PMMA. We use the SPC/E water model [2] and OPLS force field for methanol [3]. A more detailed analysis of the all-atom force field will be presented elsewhere [4].

The temperature is set to 300 K using a Berendsen thermostat with a coupling constant 0.1 ps. The time step for the simulations is chosen as 1 fs. To obtain equilibrium solvent density, initial configurations are equilibrated for 5 ns using a Berendsen barostat [5] with a coupling time of 0.5 ps and 1 atm pressure. The production runs are performed in canonical ensemble. The electrostatics are treated using Particle Mesh Ewald [6]. The interaction cutoff is chosen as 1.4 nm.

We use PMMA chains of lengths  $N_l = 30$  solvated in a simulation box consisting of  $2.0 \times 10^4$  solvent molecules with varying  $x_c$ . In Supplementary Fig. we show a plot of the all-atom simulation of PMMA in aqueous methanol. We also want to point out that the case 2 in the generic model is tuned to reproduce PMMA solvation in aqueous methanol. However, the all-atom chain consists of  $\sim 15\ell_p$  with  $\ell_p$  being the persistence length of the chain, while in the generic model we have simulated a chain of  $30\ell_p$  length. If we now take  $R_g$  for the maximally swollen chain  $R_g$  and normalized it by  $(N_l/\ell_p)^{1/3}$  taking a collapsed chain, we find  $R_g (N_l/\ell_p)^{-1/3} = 0.67\sigma$  for the generic model and 0.59 nm for all-atom chain. This gives a conversion of  $1\sigma \sim 0.9\text{nm}$  between all-atom and generic simulation.

## Supplementary Note 2: Shift in chemical potential

In order to further consolidate the relevance of the generic model for explaining polymer swelling in poor solvent mixtures, we now investigate the thermodynamic consistency between the all-atom data and the generic simulations. It is important to mention that the solvation of macromolecules is intimately linked to the energy density within the solvation volume, which is dictated by the relative interaction strengths between monomers and (co)solvent components and the relative size of (co)solvents with respect to the monomer size. In our definition thermodynamic consistency is referred to when we reproduce correct solvation energy (or chemical potential) between two models. Here, we calculate chemical potential  $\mu_p$  using the Kirkwood-Buff theory of solutions [7, 8]. If  $p$  at a dilute concentration is solvated in a mixture of  $s$  and  $c$ ,  $\mu_p$  can be calculated using [9],

$$\left(\frac{\partial \bar{\mu}_p}{\partial \rho_c}\right)_{p,T} = \frac{G_{ps} - G_{pc}}{1 - \rho_c(G_{cs} - G_{cc})}, \quad (1)$$

where  $\bar{\mu}_p = \mu_p/k_B T$ , and  $\rho_c$  is the cosolvent number density.  $G_{ij}$  is the Kirkwood-Buff integral that is related to the pair distribution function  $g_{ij}(r)$  via  $G_{ij} = 4\pi \int_0^\infty [g_{ij}(r) - 1] r^2 dr$ . The integration of Supplementary Eq. 1 gives a direct estimate of the shift in  $\bar{\mu}_p$  with increasing  $x_c$ .

In Supplementary Fig. we show  $\bar{\mu}_p$  as a function of  $x_c$ . The shift in  $\bar{\mu}_p$  per monomer between solvent and cosolvent is  $\sim 2k_B T$ , i.e.  $f(N_l)\bar{\mu}_p/N_l \sim 2k_B T$ . Considering  $f(N_l) \sim 2$ , this leads to  $[\mu_p(x_c = 0) - \mu_p(x_c = 1)]/N_l \sim k_B T$  for polymers. It is also clear that the generic model correctly reproduces intermolecular affinities and its description within the standard Flory-Huggins theory.

$$\begin{aligned} \bar{\mu}_p(\phi_p \rightarrow 0) &= \text{const} - x_c \ln x_c - (1 - x_c) \ln(1 - x_c) \\ &+ (1 - x_c)\chi_{ps} + x_c\chi_{pc} \\ &- 2x_c(1 - x_c)\chi_{sc}. \end{aligned} \quad (2)$$

- 
- [1] K. Murzyn, M. Bratek, and M. Pasenkiewicz-Gierula *J. Phys. Chem. B* **117**, 16388 (2013).
- [2] H. J. C. Berendsen, J. R. Grigera, and T. P. Straatsma, *J. Phys. Chem.* **91**, 6269 (1987).
- [3] W. L. Jorgensen, D. S. Maxwell, and J. Tirado-Rives, *J. Am. Chem. Soc.* **118**, 11225 (1996).
- [4] D. Mukherji, B. Baumeier, and K. Kremer, in preparation.
- [5] H. J. C. Berendsen, J. P. M. Postma, W. F. van Gunsteren, A. DiNola, and J. R. Haak, *J. Chem. Phys.* **81**, 3684 (1984).
- [6] U. Essmann, L. Perera, M. L. Berkowitz, T. Darden, H. Lee, L. G. A. Pedersen, *J. Chem. Phys.* **103** 8577 (1995).
- [7] J. G. Kirkwood and F. P. Buff, *J. Chem. Phys.* **19**, 774 (1951).
- [8] A. Ben-Naim, *J. Phys. Chem.* **71**, 4002 (1967).
- [9] J. Rösgen, B. M. Pettitt, and D. W. Bolen, *Biophys. J* **89**, 2988 (2005).
